# Supplementary material
Source: PubMed Central journal article supplement (PMC5341741)
Supplement: NIHMS848095-supplement-1.pdf [file NIHMS848095-supplement-1.pdf]

**Supplementary Table 1: Primers used for genotyping and qRT-PCR**

| <b>Gene</b>   | <b>Forward Primer</b>    | <b>Reverse Primer</b>     |
|---------------|--------------------------|---------------------------|
| InvtTA        | AACAACCCGTAAACTCGCCC     | GCAACCTAAAGTAAAATGCCCCAC  |
| K14rTA        | GTCGGTATCGAAGGCCTGACG    | GAGAGGAGAGCACAGCGGAAT     |
| TetORas       | TGAAAGTCGAGCTCGGTA       | GCCGGCGGTATCCAGGATGTCCAAC |
| TNF $\alpha$  | ACCACGCTCTTCTGTCTACT     | AGGAGGTTGACTTTCTCCTG      |
| IL-1 $\beta$  | AAGGGCTGCTTCCAAACCTTTGAC | ATACTGCCTGCCTGAAGCTCTTGT  |
| IFN $\gamma$  | TCTTCCTCATGGCTGTTTCTGGCT | CGCTTATGTTGTTGCTGATGGCCT  |
| IL-12         | ATGACCCTGTGCCTTGGTAG     | GGAGCTCAGATAGCCCATCA      |
| IL-33         | GGGCTCACTGCAGGAAAGTA     | TTTGCCGGGGAAATCTTGGA      |
| TSLP          | TGGTTCTTCTCAGGAGCCTCT    | GCAGCCAGGGATAGGATTGAG     |
| IL-4          | CCACGGATGCGACAAAAATCA    | CTTGGAAGCCCTACAGACGAG     |
| LT            | ACCAGAACTGACCTCAACCC     | CGACGTGGCAGTAGAGGTAAT     |
| IL-6          | AACCGCTATGAAGTTCCTCTCTGC | TAAGCCTCCGACTTGTGAAGTGGT  |
| TGF $\beta$   | TGATAAGAGGGGACGGTTTG     | ATTGGTGGGAGCAAAAACAG      |
| IL-10         | GGGTTGCCAAGCCTTATCGGAAAT | TGGCCTTGTAGACACCTTGGTCTT  |
| IL-35         | CACGGTGCCCTACATGCTAAA    | GAGAGAAGATGTCCGGGAAGG     |
| S100A9        | TCATCGACACCTTCCATCAA     | TTACTTCCCACAGCCTTTGC      |
| KC            | GCTGGGATTCACCTCAAGAA     | TCTCCGTTACTTGGGGACAC      |
| CCL2          | TCACCTGCTGCTACTCATTACCA  | AAAGGTGCTGAAGACCTTAGGGCA  |
| GM-CSF        | CAAAGGGGATATCAGTCAGAAAGG | TGTGGTCTACAGCCTCTCAGCAC   |
| IL-1 $\alpha$ | TGGCCAAAGTTCCTGACTTGTTTG | CAGGCTATTTAACCAAGTGGTGCT  |
| Arg1          | ACCTGGCCTTTGTTGATGTCCCTA | AGAGATGCTTCCAACCTGCCAGACT |

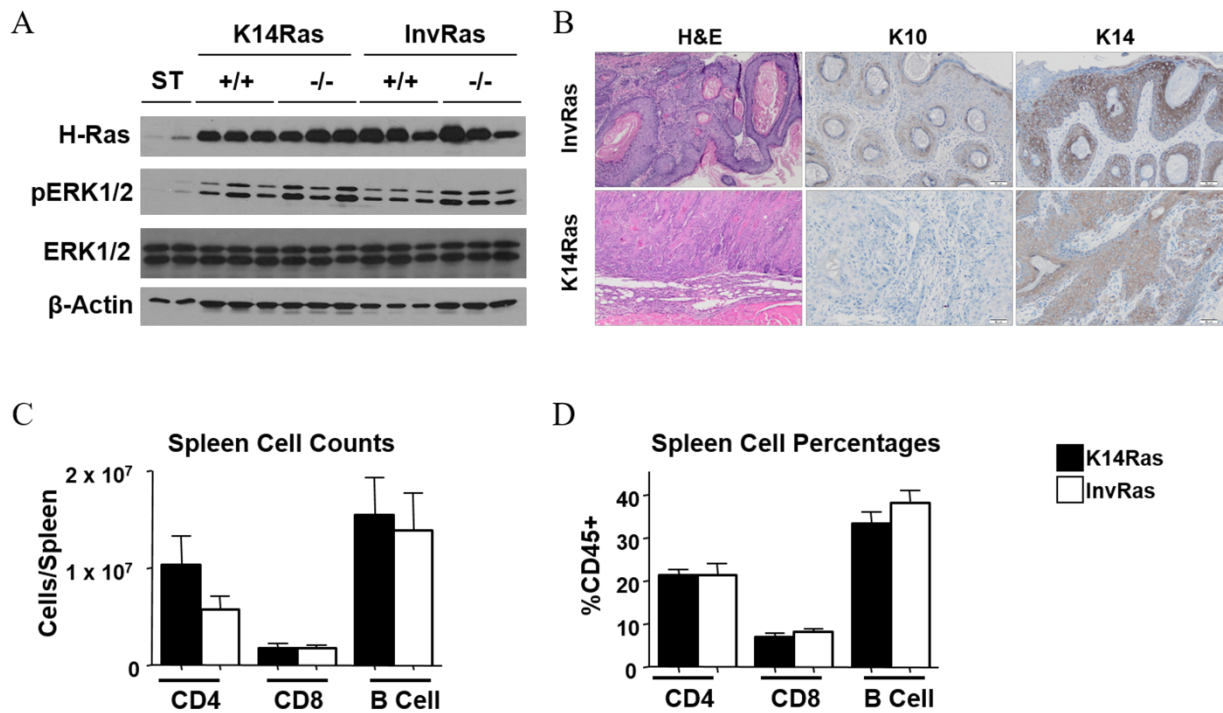

**Supplementary Figure 1:** Establishment of murine models of targeted H-Ras<sup>V12G</sup> to basal and suprabasal layers of the epidermis. (A) Immunoblot analysis of H-Ras, pERK1/2, ERK1/2, and β-Actin conducted on snap frozen whole tumor tissue of Single Transgenic control (ST), and *Rag1*<sup>+/+</sup> (+/+) and *Rag1*<sup>-/-</sup> (-/-) mice of both models. (B) stained with Hematoxylin & Eosin (H&E), Keratin10, and Keratin14. H&E magnification 10x, Keratin10/14 magnification 20x. Analysis of splenic cell counts (C) and percentages (D), in K14Ras and InvRas tumor-bearing mice. Counts were determined using a Cellometer Auto T4 Cell Viability Counter (Nexcelom Bioscience), and quantified using FlowJo software. (C: n=10 per group, D: K14Ras n=30,30,27, InvRas n=30,30,30).

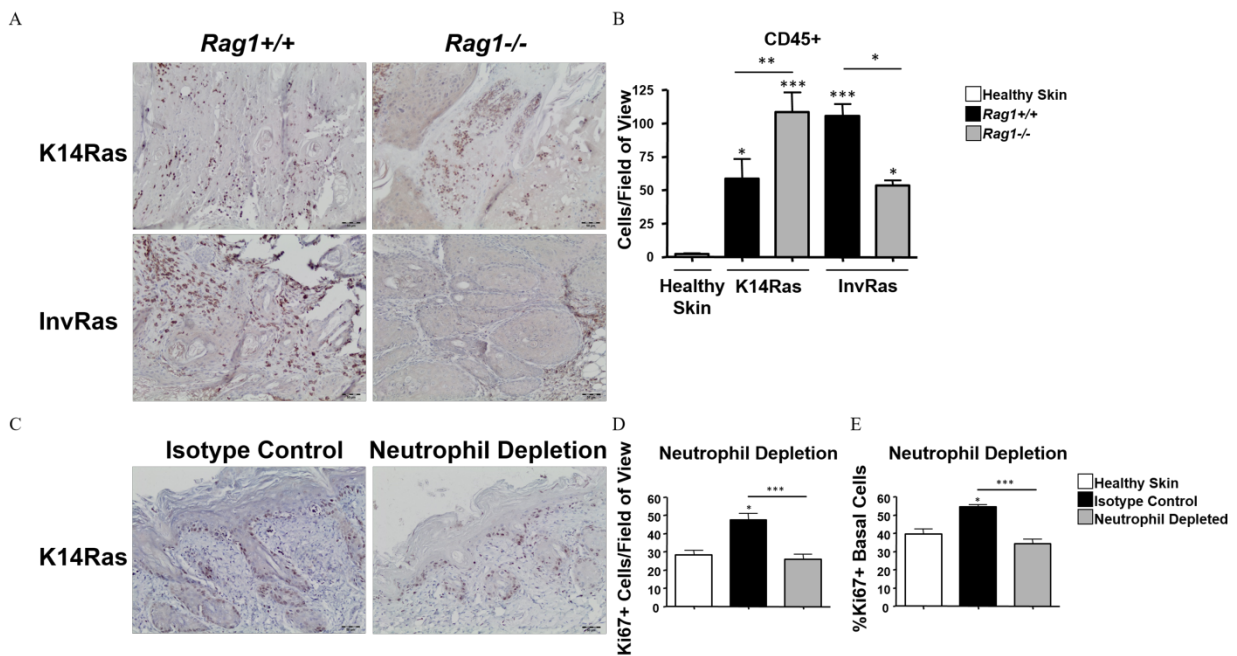

**Supplementary Figure 2:** Leukocyte infiltration into K14Ras and InvRas tumors correlates with tumor number and basal cell proliferation. Immunohistochemical analysis of CD45+ cell number and localization within tumor tissue of K14Ras and InvRas *Rag1*<sup>+/+</sup> and *Rag1*<sup>-/-</sup> (A). Magnification 20x. Average CD45+ cell counts (B) per field of view. Bars represent n=4 with 5 random fields counted (n=20). Representative immunohistochemical analysis of Ki67+ staining in hyperplastic skin of K14Ras isotype control and neutrophil depletions (C). Magnification 20x. Ki67+ basal cell number (D) and percent of total basal cells (E) quantifications. (D/E: n=5, 15, 20, 20, 20)

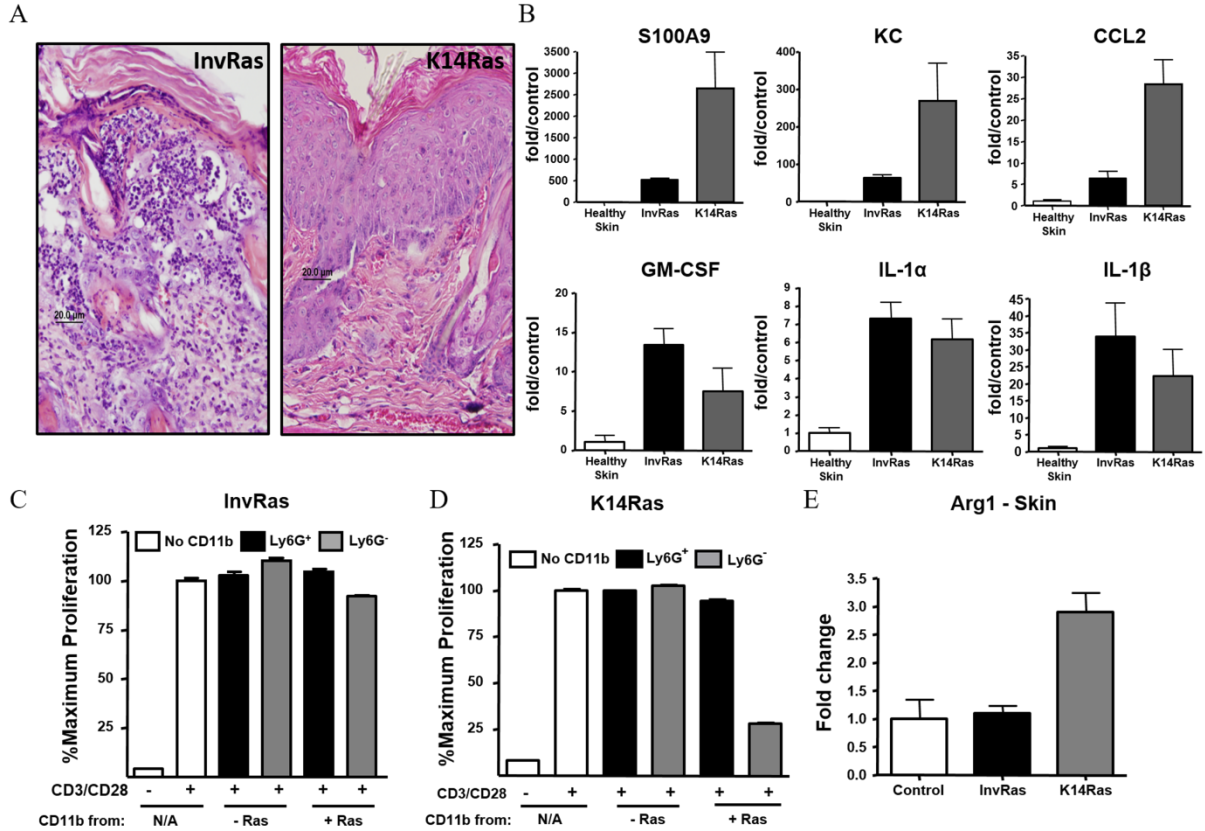

**Supplementary Figure 3:** Cytokine expression and MDSC suppression assays display distinct immunosuppressive phenotypes in K14Ras mice. Representative H&E images of K14Ras or InvRas hyperplastic skin (A). qPCR amplification of dorsal skin cDNA from healthy skin, InvRas, and K14Ras mice for the genes listed (B). (A: n=4-6 per group). Suppression assay using sorted CD11b<sup>+</sup> cells from spleens of InvRas (C) or K14Ras (D) mice respectively. qPCR for Arg1 transcripts in total skin from the indicated groups (E).

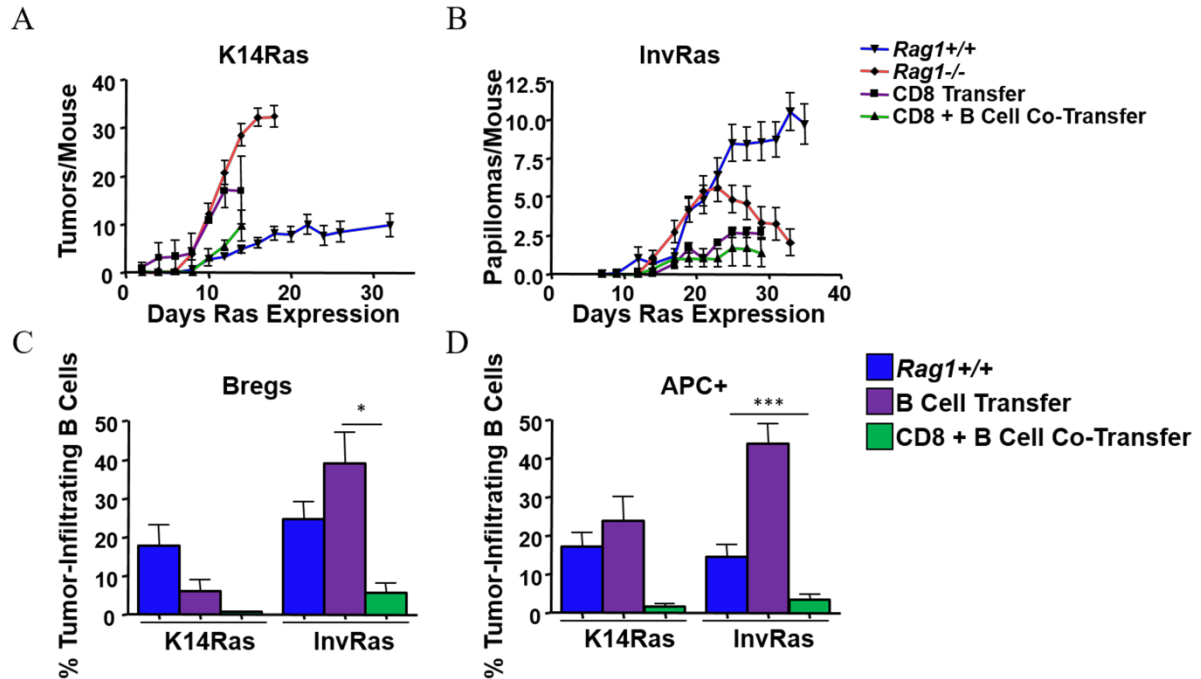

**Supplementary Figure 4:** CD8 or CD8 + B Cell transfers do not restore *Rag1*<sup>+/+</sup> tumor counts or B cell phenotypes. Tumor counts in adoptively transferred K14Ras*Rag1*<sup>-/-</sup> (A) and InvRas*Rag1*<sup>-/-</sup> (B) mice at indicated days after Ras induction. K14Ras*Rag1*<sup>+/+</sup>, K14Ras*Rag1*<sup>-/-</sup>, InvRas*Rag1*<sup>+/+</sup>, and InvRas*Rag1*<sup>-/-</sup> mice from previous figures included as reference. (A: K14Ras*Rag1*<sup>+/+</sup> n=45, K14Ras*Rag1*<sup>-/-</sup> n=28. CD8 Adoptive Transfer n=3, CD8 + B Cell Co-Transfer n=4. B: InvRas*Rag1*<sup>+/+</sup> n=30, InvRas*Rag1*<sup>-/-</sup> n=27, CD8 Adoptive Transfer n=3, CD8 + B Cell Co-Transfer n=3). Analysis of tumor-infiltrating Bregs (C), and APC<sup>+</sup> B Cells (D) in adoptive transfer experiments. (C: K14Ras*Rag1*<sup>+/+</sup> n=5, K14Ras B Cell Transfer n=10, K14Ras CD8 + B Cell Co-Transfer n=3. D: InvRas*Rag1*<sup>+/+</sup> n=9, InvRas B Cell Transfer n=3, InvRas CD8 + B Cell Co-Transfer n=3.)

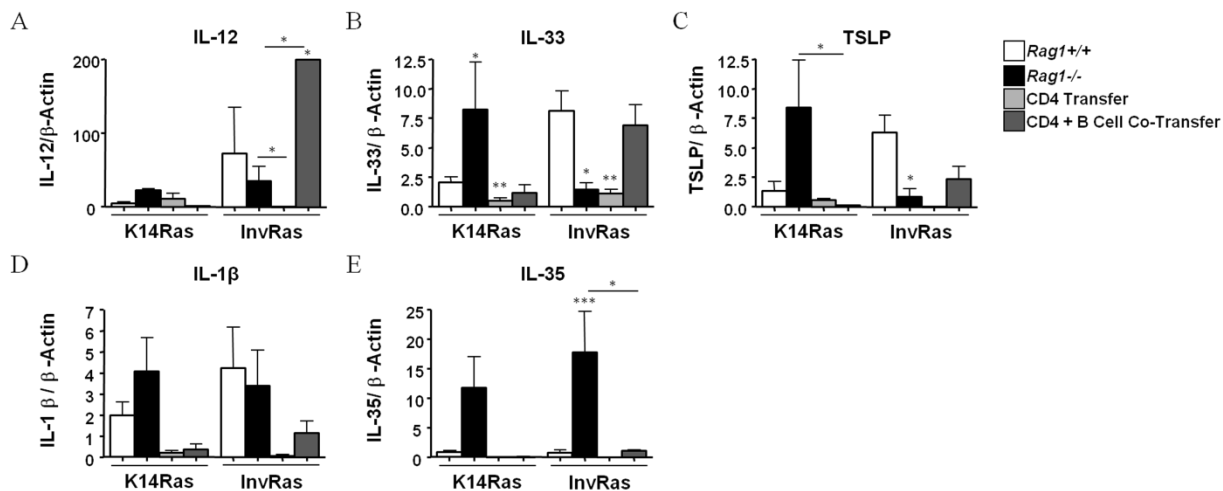

**Supplementary Figure 5:** Adoptive co-transfer of CD4 T Cells and B cells selectively restores *Rag1*<sup>+/+</sup> cytokine expression. Relative expression of specific cytokines by qPCR in whole tumor tissue from adoptive transfer experiments examining IL-12 (A), IL-33 (B), Thymic Stromal Lymphoprotein (TSLP) (C), IL-1 $\beta$  (D), and IL-35 (E). Samples below detection level were not used in analysis. K14Ras*Rag1*<sup>+/+</sup> n=15(A), 16(B), 17(C), 16(D), 16(E), K14Ras*Rag1*<sup>-/-</sup> n=4(A), 4(B), 4(C), 4(D), 4(E), K14Ras CD4 Adoptive Transfer n=8(A), 8(B), 7(C), 4(D), 3(E), K14Ras CD4 + B Cell Co-Transfer n=4(A), 8(B), 6(C), 4(D), 2(E). InvRas*Rag1*<sup>+/+</sup> n=6(A), 12(B), 12(C), 12(D), 6(E), InvRas*Rag1*<sup>-/-</sup> n=2(A), 4(B), 3(C), 5(D), 5(E), InvRas CD4 Adoptive Transfer n=2(A), 4(B), 3(C), 2(D), 2(E), InvRas CD4 + B Cell Co-Transfer n=2(A), 6(B), 4(C), 3(D), 2(E).

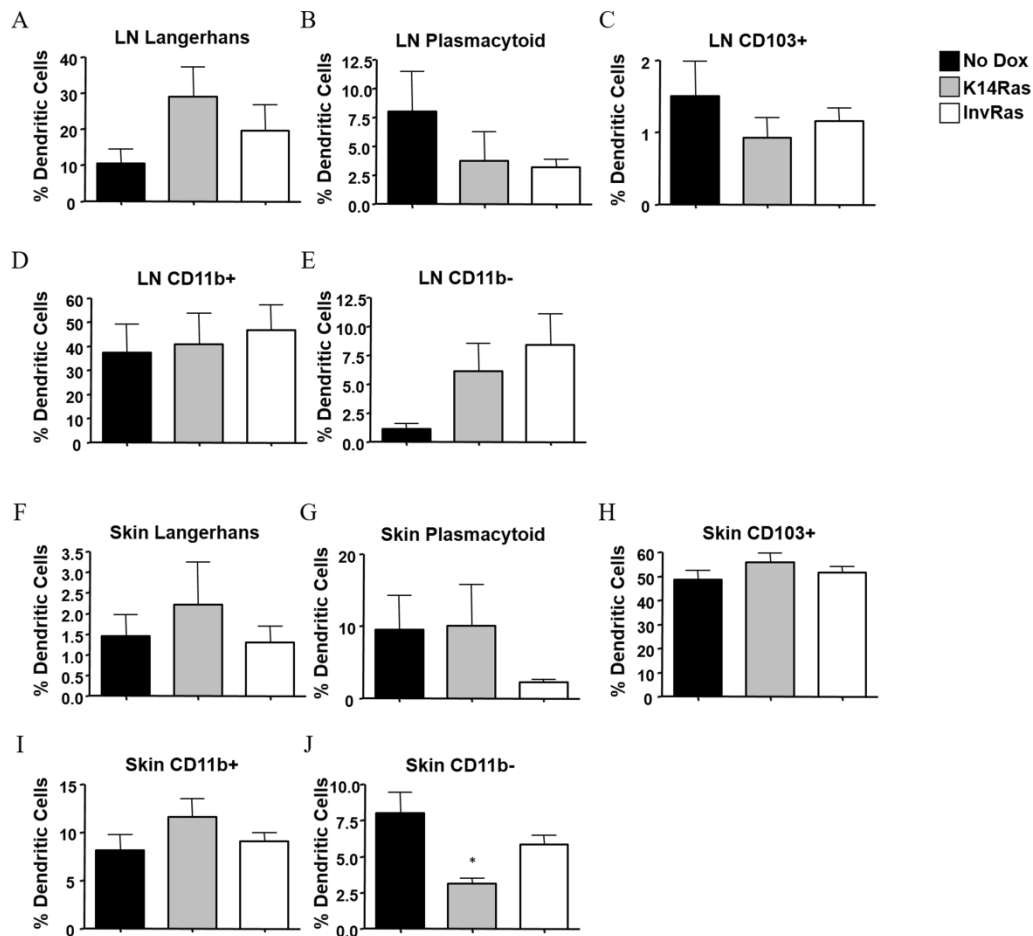

**Supplementary Figure 6:** Dendritic Cell activity in hyperplastic skin or SDLNs does not significantly contribute to the overall Ras-induced immune response. Analysis of epidermal and dermal dendritic cell subsets in inguinal lymph nodes of healthy control (No Dox) and tumor-bearing K14Ras and InvRas mice. Dendritic cell subsets analyzed include Langerhans cells (A), Plasmacytoid (B), CD103+ Dermal DCs (C), CD11b+ myeloid DCs (D), and CD11b- lymphoid DCs (E). No dox n=4, K14Ras n=4, InvRas n=5. Analysis of Langerhans cells (F), Plasmacytoid (G), CD103+ Dermal DCs (H), CD11b+ myeloid DCs (I), and CD11b- lymphoid DCs (J) in healthy skin and hyperplastic skin of K14Ras and InvRas mice. No Dox n=4, K14Ras n=4, InvRas n=6.

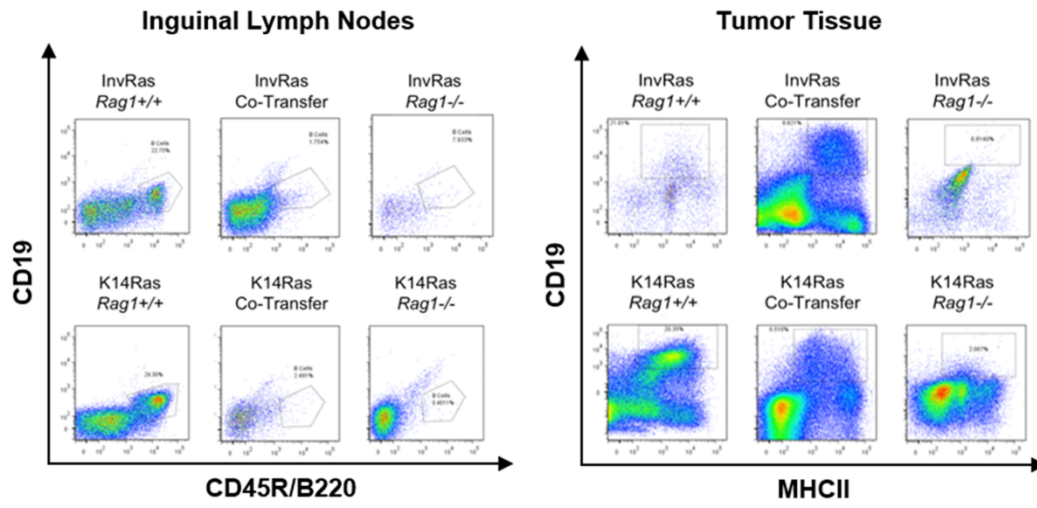

**Supplementary Figure 7:** Adoptively transferred B cells migrate directly to the tumor microenvironment following Ras activation. Representative flow cytometric analysis of inguinal lymph nodes and tumor tissue of *Rag1*<sup>+/+</sup>, *Rag1*<sup>-/-</sup>, and co-transferred mice. B cells were gated on CD19/CD45R/B220<sup>+/+</sup> within the CD45<sup>+</sup>, CD3<sup>-</sup> population within lymph nodes, and on CD19/MHCII<sup>+/+</sup> within the Live CD45<sup>+</sup> population in tumor tissue.
